# Supplementary material
Source: ML conference proceedings conference paper supplement (https://proceedings.mlr.press/v89/yu19a.html)
Supplement: Supplementary file [file yu19a-supp.pdf]

# Supplementary Materials for “Exploring Fast and Communication-Efficient Algorithms in Large-scale Distributed Networks”

## 1 Proof of Unbiased Quantization Variance

**Lemma 1.** *If  $x \in \mathbb{R}$  is in the convex hull of  $\text{dom}(\delta, b)$ , then the quantization variance can be bounded as*

$$\mathbf{E}[(Q_{(\delta,b)}(x) - x)^2] \leq \frac{\delta^2}{4}. \quad (1)$$

*Proof.* From the manuscript we know that if  $x$  is in the convex hull of  $\text{dom}(\delta, b)$ , then it will be stochastically rounded up or down. Without loss of generality, let  $z + \delta$  and  $z$  be the up and down quantization values respectively, then

$$Q_{(\delta,b)}(x) = \begin{cases} z & \text{with probability } \frac{z+\delta-x}{\delta}, \\ z + \delta & \text{otherwise.} \end{cases}$$

Note that if  $x$  equals to the smallest or largest value in  $\text{dom}(\delta, b)$ , then  $Q_{(\delta,b)}(x) = x$  from the above definition of function  $Q$ . Firstly, it can be verified that  $\mathbf{E}[Q_{(\delta,b)}(x)] = x$ , then we have

$$\mathbf{E}[(Q_{(\delta,b)}(x) - x)^2] = \frac{z + \delta - x}{\delta}(z - x)^2 + \frac{x - z}{\delta}(z + \delta - x)^2 = (x - z)(z + \delta - x) \leq \frac{\delta^2}{4}. \quad (2)$$

□

## 2 Proof of Theorem 2

**Lemma 2.** *For  $\omega \in \mathbb{R}^d$ ,  $\lambda \in (0, 1]$ , if  $\delta = \frac{\lambda \|\omega\|_\infty}{2^{b-1} - 1}$ , then*

$$\mathbf{E}\|Q_{(\delta,b)}(\omega) - \omega\|^2 \leq \frac{(d - d_\lambda)\delta^2}{4} + d_\lambda(1 - \lambda)^2\|\omega\|^2, \quad (3)$$

where  $d_\lambda$  is the number of coordinates in  $\omega$  exceeding  $\text{dom}(\delta, b)$ .

*Proof.* Since the squared norm  $\|Q_{(\delta,b)}(\omega) - \omega\|^2$  separates along dimensions, it suffices to consider a single coordinate  $\omega_i$ . If  $\omega_i$  is in the convex hull of  $\text{dom}(\delta, b)$ , then according to Lemma 1 we have

$$\mathbf{E}[(Q_{(\delta,b)}(\omega_i) - \omega_i)^2] \leq \frac{\delta^2}{4}. \quad (4)$$

On the other hand, if  $\omega_i$  is not in the convex hull of  $\text{dom}(\delta, b)$ , then  $Q_{(\delta,b)}(\omega_i)$  is either the smallest or the largest value of  $\text{dom}(\delta, b)$ . Therefore,  $(Q_{(\delta,b)}(\omega_i) - \omega_i)^2 \leq (\lambda \|\omega\|_\infty - \|\omega\|_\infty)^2 = (1 - \lambda)^2 \|\omega\|_\infty^2 \leq (1 - \lambda)^2 \|\omega\|^2$ . Summing up over all dimensions we get (3). □

**Lemma 3.** For the iterates  $x_t^{s+1}$ ,  $\tilde{x}^s$  in Algorithm 1, define  $g_t \triangleq \frac{1}{B} \sum_{j=1}^B [\nabla f_j(x_t^{s+1}) - \nabla f_j(\tilde{x}^s)] + \nabla f(\tilde{x}^s)$ , where each element  $j$  is uniformly and independently sampled from  $\{1, \dots, n\}$ , we have

$$\mathbf{E} \|g_t - \nabla f(x_t^{s+1})\|^2 \leq \frac{L^2}{B} \mathbf{E} \|x_t^{s+1} - \tilde{x}^s\|^2. \quad (5)$$

*Proof.*

$$\begin{aligned} \mathbf{E} \|g_t - \nabla f(x_t^{s+1})\|^2 &= \mathbf{E} \left\| \frac{1}{B} \sum_{j=1}^B [\nabla f_j(x_t^{s+1}) - \nabla f_j(\tilde{x}^s) + \nabla f(\tilde{x}^s) - \nabla f(x_t^{s+1})] \right\|^2 \\ &= \frac{1}{B^2} \sum_{j=1}^B \mathbf{E} \|\nabla f_j(x_t^{s+1}) - \nabla f_j(\tilde{x}^s) + \nabla f(\tilde{x}^s) - \nabla f(x_t^{s+1})\|^2 \\ &\leq \frac{1}{B^2} \sum_{j=1}^B \mathbf{E} \|\nabla f_j(x_t^{s+1}) - \nabla f_j(\tilde{x}^s)\|^2 \\ &\leq \frac{L^2}{B} \mathbf{E} \|x_t^{s+1} - \tilde{x}^s\|^2, \end{aligned} \quad (6)$$

where the first inequality uses  $\mathbf{E} \|x - \mathbf{E}x\|^2 \leq \mathbf{E} \|x\|^2$  and the last inequality follows from the Lipschitz smooth property of  $f_j(x)$ .  $\square$

**Lemma 4.** Denote  $d_\lambda = \max_i \{d_\lambda^i\}$ , where  $d_\lambda^i$  is the number of coordinates in  $u_t^i$  exceeding  $\text{dom}(\delta_t^i, b)$ . Under communication scheme (a) or (b), i.e.,  $\tilde{u}_t = \frac{1}{N} \sum_{i=1}^N \tilde{u}_t^i$ , we have

$$\mathbf{E} \|v_t^{s+1} - \nabla f(x_t^{s+1})\|^2 \leq 2L^2 \left[ \frac{d\lambda^2}{4(2^{b-1} - 1)^2} + d_\lambda(1 - \lambda)^2 + \frac{1}{NB} \right] \mathbf{E} \|x_t^{s+1} - \tilde{x}^s\|^2. \quad (7)$$

Note that  $\delta_t^i$  has different value for (a) and (b).

*Proof. Case 1.* First of all, we consider communication scheme (a), i.e.,  $\tilde{u}_t = \frac{1}{N} \sum_{i=1}^N \tilde{u}_t^i = \frac{1}{N} \sum_{i=1}^N Q_{(\delta_t^i, b)}(u_t^i)$ , where  $\delta_t^i = \frac{\lambda \|u_t^i\|_\infty}{2^{b-1} - 1}$ . Therefore

$$\begin{aligned} &\mathbf{E} \|v_t^{s+1} - \nabla f(x_t^{s+1})\|^2 \\ &= \mathbf{E} \left\| \frac{1}{N} \sum_{i=1}^N Q_{(\delta_t^i, b)}(u_t^i) - \frac{1}{N} \sum_{i=1}^N u_t^i + \frac{1}{N} \sum_{i=1}^N u_t^i + \nabla f(\tilde{x}^s) - \nabla f(x_t^{s+1}) \right\|^2 \\ &\leq 2 \underbrace{\mathbf{E} \left\| \frac{1}{N} \sum_{i=1}^N Q_{(\delta_t^i, b)}(u_t^i) - \frac{1}{N} \sum_{i=1}^N u_t^i \right\|^2}_{L_1} + 2 \mathbf{E} \left\| \frac{1}{N} \sum_{i=1}^N u_t^i + \nabla f(\tilde{x}^s) - \nabla f(x_t^{s+1}) \right\|^2, \end{aligned} \quad (8)$$

where  $L_1$  can be bounded as follows.

$$\begin{aligned} L_1 &\leq \frac{1}{N} \sum_{i=1}^N \mathbf{E} \|Q_{(\delta_t^i, b)}(u_t^i) - u_t^i\|^2 \\ &\leq \frac{1}{N} \sum_{i=1}^N \mathbf{E} \left[ \frac{d\lambda^2}{4(2^{b-1} - 1)^2} + d_\lambda^i(1 - \lambda)^2 \right] \|u_t^i\|^2 \\ &\leq \frac{1}{N} \left[ \frac{d\lambda^2}{4(2^{b-1} - 1)^2} + d_\lambda(1 - \lambda)^2 \right] \sum_{i=1}^N \mathbf{E} \|u_t^i\|^2 \\ &\leq L^2 \left[ \frac{d\lambda^2}{4(2^{b-1} - 1)^2} + d_\lambda(1 - \lambda)^2 \right] \mathbf{E} \|x_t^{s+1} - \tilde{x}^s\|^2, \end{aligned} \quad (9)$$

where the second inequality uses Lemma 2 and the last inequality is due to the smoothness of  $f_i(x)$ . Substituting (9) into (8) and using Lemma 3, we get (7).

**Case 2.** If employing communication scheme (b), we have  $\tilde{u}_t = \frac{1}{N} \sum_{i=1}^N \tilde{u}_t^i = \frac{1}{N} \sum_{i=1}^N Q_{(\delta_t, b)}(u_t^i)$ , where  $\delta_t = \max_i \{\delta_t^i\}$ .

Denote  $j = \arg \max_i \|u_t^i\|_\infty$ , therefore  $\delta_t = \frac{\lambda \|u_t^j\|_\infty}{2^{b-1}-1}$ . Then let  $\delta_t^i = \delta_t$  for all  $i$ , putting back into (8) we obtain

$$\begin{aligned} & \mathbf{E} \|v_t^{s+1} - \nabla f(x_t^{s+1})\|^2 \\ & \leq 2 \underbrace{\mathbf{E} \left\| \frac{1}{N} \sum_{i=1}^N Q_{(\delta_t, b)}(u_t^i) - \frac{1}{N} \sum_{i=1}^N u_t^i \right\|^2}_{L'_1} + 2 \mathbf{E} \left\| \frac{1}{N} \sum_{i=1}^N u_t^i + \nabla f(\tilde{x}^s) - \nabla f(x_t^{s+1}) \right\|^2, \end{aligned} \quad (10)$$

where  $L'_1$  has a bound of

$$\begin{aligned} L'_1 & \leq \frac{1}{N} \sum_{i=1}^N \mathbf{E} \|Q_{(\delta_t, b)}(u_t^i) - u_t^i\|^2 \\ & \leq \frac{1}{N} \sum_{i=1}^N \mathbf{E} \left[ \frac{d\lambda^2}{4(2^{b-1}-1)^2} + d_\lambda^i (1-\lambda)^2 \right] \|u_t^i\|^2 \\ & \leq \frac{1}{N} \left[ \frac{d\lambda^2}{4(2^{b-1}-1)^2} + d_\lambda (1-\lambda)^2 \right] \sum_{i=1}^N \mathbf{E} \|u_t^i\|^2 \\ & \leq L^2 \left[ \frac{d\lambda^2}{4(2^{b-1}-1)^2} + d_\lambda (1-\lambda)^2 \right] \mathbf{E} \|x_t^{s+1} - \tilde{x}^s\|^2. \end{aligned} \quad (11)$$

We adopt

$$\mathbf{E} \|Q_{(\delta_t, b)}(u_t^i) - u_t^i\|^2 \leq \mathbf{E} \left[ \frac{d\lambda^2}{4(2^{b-1}-1)^2} + d_\lambda^i (1-\lambda)^2 \right] \|u_t^i\|^2 \quad (12)$$

in the second inequality in (11), which can be verified following the proof of Lemma 2 with  $\delta_t = \frac{\lambda \|u_t^j\|_\infty}{2^{b-1}-1}$ . Putting the above inequalities together we obtain (7).  $\square$

**Lemma 5.** Under communication scheme (c) with  $\tilde{u}_t = Q_{(\delta_t, b)}(\frac{1}{N} \sum_{i=1}^N \tilde{u}_t^i)$ ,  $\tilde{u}_t^i = Q_{(\delta_t, b)}(u_t^i)$ ,  $\delta_t = \max_i \{\delta_t^i\}$ , we obtain

$$\mathbf{E} \|v_t^{s+1} - \nabla f(x_t^{s+1})\|^2 \leq 2L^2 \left[ \frac{3d\lambda^2}{8(2^{b-1}-1)^2} + d_\lambda (1-\lambda)^2 + \frac{1}{NB} \right] \mathbf{E} \|x_t^{s+1} - \tilde{x}^s\|^2, \quad (13)$$

where  $d_\lambda = \max_i \{d_\lambda^i\}$ ,  $d_\lambda^i$  is the number of coordinates in  $u_t^i$  exceeding  $\text{dom}(\delta_t^i, b)$ .

*Proof.*

$$\mathbf{E} \|v_t^{s+1} - \nabla f(x_t^{s+1})\|^2 = \underbrace{\mathbf{E} \left\| Q_{(\delta_t, b)}\left(\frac{1}{N} \sum_{i=1}^N \tilde{u}_t^i\right) - \frac{1}{N} \sum_{i=1}^N \tilde{u}_t^i \right\|^2}_{L_2} + \underbrace{\mathbf{E} \left\| \frac{1}{N} \sum_{i=1}^N \tilde{u}_t^i + \nabla f(\tilde{x}^s) - \nabla f(x_t^{s+1}) \right\|^2}_{L_3} \quad (14)$$

where the equality holds because  $Q_{(\delta_t, b)}(\frac{1}{N} \sum_{i=1}^N \tilde{u}_t^i)$  is an unbiased quantization (note that each  $u_t^i$  is quantized using  $\delta_t$ ,

therefore, all coordinates of  $\frac{1}{N} \sum_{i=1}^N \tilde{u}_t^i$  are in the convex hull of  $\text{dom}(\delta_t, b)$ ).

From Lemma 1 and **Case 2** in Lemma 4 we obtain

$$\begin{aligned}
L_2 &\leq \frac{d\delta_t^2}{4} \\
&\leq \frac{d\lambda^2 \|u_t^j\|_\infty^2}{4(2^{b-1}-1)^2}, \quad j = \arg \max_i \|u_t^i\|_\infty \\
&\leq \frac{L^2 d\lambda^2}{4(2^{b-1}-1)^2} \mathbf{E} \|x_t^{s+1} - \tilde{x}^s\|^2
\end{aligned} \tag{15}$$

and

$$L_3 \leq 2L^2 \left[ \frac{d\lambda^2}{4(2^{b-1}-1)^2} + d_\lambda(1-\lambda)^2 + \frac{1}{NB} \right] \mathbf{E} \|x_t^{s+1} - \tilde{x}^s\|^2. \tag{16}$$

Putting them together, we get (13).  $\square$

**Proof of Theorem 2.** Define  $\bar{x}_{t+1}^{s+1} = \text{prox}_{\eta h}(x_t^{s+1} - \eta \nabla f(x_t^{s+1}))$ . Following the proof of Theorem 5 in [2] (equations (8)-(12)), we get

$$\mathbf{E} \left[ P(x_{t+1}^{s+1}) \right] \leq \mathbf{E} \left[ P(x_t^{s+1}) + \frac{\eta}{2} \|v_t^{s+1} - \nabla f(x_t^{s+1})\|^2 + (L - \frac{1}{2\eta}) \|\bar{x}_{t+1}^{s+1} - x_t^{s+1}\|^2 + (\frac{L}{2} - \frac{1}{2\eta}) \|x_{t+1}^{s+1} - x_t^{s+1}\|^2 \right]. \tag{17}$$

If adopting communication scheme **(a)** or **(b)**, combining Lemma 4, we have

$$\begin{aligned}
\mathbf{E} \left[ P(x_{t+1}^{s+1}) \right] &\leq \mathbf{E} \left[ P(x_t^{s+1}) + \eta L^2 \left[ \frac{d\lambda^2}{4(2^{b-1}-1)^2} + d_\lambda(1-\lambda)^2 + \frac{1}{NB} \right] \|x_t^{s+1} - \tilde{x}^s\|^2 \right. \\
&\quad \left. + (L - \frac{1}{2\eta}) \|\bar{x}_{t+1}^{s+1} - x_t^{s+1}\|^2 + (\frac{L}{2} - \frac{1}{2\eta}) \|x_{t+1}^{s+1} - x_t^{s+1}\|^2 \right].
\end{aligned} \tag{18}$$

Define  $R_t^{s+1} \triangleq \mathbf{E} \left[ P(x_t^{s+1}) + c_t \|x_t^{s+1} - \tilde{x}^s\|^2 \right]$  and a sequence  $\{c_t\}_{t=0}^m$  with  $c_m = 0$  and  $c_t = c_{t+1}(1+\beta) + \eta L^2 \left[ \frac{d\lambda^2}{4(2^{b-1}-1)^2} + d_\lambda(1-\lambda)^2 + \frac{1}{NB} \right]$ , where  $\beta = \frac{1}{m}$ . Therefore  $\{c_t\}$  is a decreasing sequence. We first derive the bound of  $c_0$  in the following.

$$\begin{aligned}
c_0 &\leq \eta L^2 \left[ \frac{d\lambda^2}{4(2^{b-1}-1)^2} + d_\lambda(1-\lambda)^2 + \frac{1}{NB} \right] \cdot \frac{(1+\beta)^m - 1}{\beta} \\
&\leq 2m\eta L^2 \left[ \frac{d\lambda^2}{4(2^{b-1}-1)^2} + d_\lambda(1-\lambda)^2 + \frac{1}{NB} \right]
\end{aligned} \tag{19}$$

where the second inequality uses  $\beta = \frac{1}{m}$ . Denote  $\eta = \frac{\rho}{L}$ . Then inequality (19) can be simplified as

$$c_0 \leq 2m\rho L \left[ \frac{d\lambda^2}{4(2^{b-1}-1)^2} + d_\lambda(1-\lambda)^2 + \frac{1}{NB} \right]. \tag{20}$$

On the other hand,

$$\begin{aligned}
R_{t+1}^{s+1} &= \mathbf{E} \left[ P(x_{t+1}^{s+1}) + c_{t+1} \|x_{t+1}^{s+1} - \tilde{x}^s\|^2 \right] \\
&\leq \mathbf{E} \left[ P(x_{t+1}^{s+1}) + c_{t+1} \left(1 + \frac{1}{\beta}\right) \|x_{t+1}^{s+1} - x_t^{s+1}\|^2 + c_{t+1}(1+\beta) \|x_t^{s+1} - \tilde{x}^s\|^2 \right] \\
&\leq \mathbf{E} \left[ P(x_t^{s+1}) + c_t \|x_t^{s+1} - \tilde{x}^s\|^2 + \left(c_{t+1} \left(1 + \frac{1}{\beta}\right) + \frac{L}{2} - \frac{1}{2\eta}\right) \|x_{t+1}^{s+1} - x_t^{s+1}\|^2 + \left(L - \frac{1}{2\eta}\right) \|\bar{x}_{t+1}^{s+1} - x_t^{s+1}\|^2 \right].
\end{aligned} \tag{21}$$

Now we derive the bound for  $\rho$  and  $b$  to make sure  $(c_{t+1}(1 + \frac{1}{\beta}) + \frac{L}{2} - \frac{1}{2\eta}) \leq 0$ , and it suffices to let  $c_0(1 + \frac{1}{\beta}) + \frac{L}{2} \leq \frac{1}{2\eta}$ . Combining (20) and  $\beta = \frac{1}{m}$ ,  $\eta = \frac{\rho}{L}$ , we only need to guarantee

$$8m^2 \rho^2 \left[ \frac{d\lambda^2}{4(2^{b-1}-1)^2} + d_\lambda(1-\lambda)^2 + \frac{1}{NB} \right] + \rho \leq 1. \tag{22}$$

If the above constraint holds, then

$$R_{t+1}^{s+1} \leq R_t^{s+1} + (L - \frac{1}{2\eta}) \mathbf{E} \|\bar{x}_{t+1}^{s+1} - x_t^{s+1}\|^2. \quad (23)$$

Summing it up over  $t = 0$  to  $m - 1$  and  $s = 0$  to  $S - 1$ , using  $c_m = 0$ ,  $x_0^{s+1} = \tilde{x}^s$  and  $x_m^{s+1} = \tilde{x}^{s+1}$  we get

$$(\frac{1}{2\eta} - L) \sum_{s=0}^{S-1} \sum_{t=0}^{m-1} \mathbf{E} \|\bar{x}_{t+1}^{s+1} - x_t^{s+1}\|^2 \leq P(x^0) - P(x^*). \quad (24)$$

Applying the definition of  $G_\eta(x_t^{s+1})$ , we obtain results in Theorem 2. Moreover, the analysis of communication scheme (c) can be similarly obtained using the above proof steps.  $\square$

### 3 Proof of ALPC-SVRG

**Lemma 6.** For  $\hat{v}_{k+1} = \frac{1}{B} \sum_{j=1}^B [\nabla f_j(x_{k+1}) - \nabla f_j(\tilde{x}^s)] + \nabla f(\tilde{x}^s)$ , where each element  $j$  is uniformly and independently sampled from  $\{1, \dots, n\}$ , we have

$$\mathbf{E} \|\hat{v}_{k+1} - \nabla f(x_{k+1})\|^2 \leq \frac{2L}{B} \mathbf{E} [f(\tilde{x}^s) - f(x_{k+1}) - \langle \nabla f(x_{k+1}), \tilde{x}^s - x_{k+1} \rangle]. \quad (25)$$

*Proof.*

$$\begin{aligned} \mathbf{E} \|\hat{v}_{k+1} - \nabla f(x_{k+1})\|^2 &\leq \frac{1}{B^2} \sum_{j=1}^B \mathbf{E} \|\nabla f_j(x_{k+1}) - \nabla f_j(\tilde{x}^s)\|^2 \\ &\leq \frac{2L}{B} \mathbf{E} [f(\tilde{x}^s) - f(x_{k+1}) - \langle \nabla f(x_{k+1}), \tilde{x}^s - x_{k+1} \rangle], \end{aligned} \quad (26)$$

where the first inequality follows from Lemma 3 and the last inequality adopts the Lipschitz smooth property of  $f_j(x)$ .  $\square$

**Lemma 7.** Denote  $d_\lambda = \max_i \{d_\lambda^i\}$ , where  $d_\lambda^i$  is the number of coordinates in  $u_{k+1}^i$  exceeding  $\text{dom}(\delta_{k+1}^i, b)$ , then we have

$$\mathbf{E} \|v_{k+1} - \nabla f(x_{k+1})\|^2 \leq 4L \left[ \frac{d\lambda^2}{4(2^{b-1} - 1)^2} + d_\lambda(1 - \lambda)^2 + \frac{1}{NB} \right] \mathbf{E} [f(\tilde{x}^s) - f(x_{k+1}) - \langle \nabla f(x_{k+1}), \tilde{x}^s - x_{k+1} \rangle]. \quad (27)$$

*Proof.*

$$\begin{aligned} &\mathbf{E} \|v_{k+1} - \nabla f(x_{k+1})\|^2 \\ &\leq 2 \underbrace{\mathbf{E} \left\| \frac{1}{N} \sum_{i=1}^N Q_{(\delta_{k+1}^i, b)}(u_{k+1}^i) - \frac{1}{N} \sum_{i=1}^N u_{k+1}^i \right\|^2}_{A_1} + 2 \underbrace{\mathbf{E} \left\| \frac{1}{N} \sum_{i=1}^N u_{k+1}^i + \nabla f(\tilde{x}^s) - \nabla f(x_{k+1}) \right\|^2}_{A_2}. \end{aligned} \quad (28)$$

Using the same arguments of Lemma 6 we obtain

$$A_2 \leq \frac{2L}{NB} \mathbf{E} [f(\tilde{x}^s) - f(x_{k+1}) - \langle \nabla f(x_{k+1}), \tilde{x}^s - x_{k+1} \rangle]. \quad (29)$$

Moreover,

$$\begin{aligned}
A_1 &\leq \frac{1}{N} \sum_{i=1}^N \mathbf{E} \|Q_{(\delta_{k+1}^i, b)}(u_{k+1}^i) - u_{k+1}^i\|^2 \\
&\leq \frac{1}{N} \sum_{i=1}^N \mathbf{E} \left[ \frac{d\lambda^2}{4(2^{b-1}-1)^2} + d_\lambda^i(1-\lambda)^2 \right] \|u_{k+1}^i\|^2 \\
&\leq \frac{1}{N} \left[ \frac{d\lambda^2}{4(2^{b-1}-1)^2} + d_\lambda(1-\lambda)^2 \right] \sum_{i=1}^N \mathbf{E} \|u_{k+1}^i\|^2 \\
&\leq 2L \left[ \frac{d\lambda^2}{4(2^{b-1}-1)^2} + d_\lambda(1-\lambda)^2 \right] \mathbf{E} [f(\tilde{x}^s) - f(x_{k+1}) - \langle \nabla f(x_{k+1}), \tilde{x}^s - x_{k+1} \rangle],
\end{aligned} \tag{30}$$

where the second inequality follows from Lemma 2. Putting them together, we obtain (27).  $\square$

**Lemma 8.**

$$\mathbf{E} \|\hat{v}_{k+1} - v_{k+1}\|^2 \leq 4L \left[ \frac{1}{2B} + \frac{d\lambda^2}{4(2^{b-1}-1)^2} + d_\lambda(1-\lambda)^2 + \frac{1}{NB} \right] \mathbf{E} [f(\tilde{x}^s) - f(x_{k+1}) - \langle \nabla f(x_{k+1}), \tilde{x}^s - x_{k+1} \rangle]. \tag{31}$$

*Proof.*

$$\begin{aligned}
\mathbf{E} \|\hat{v}_{k+1} - v_{k+1}\|^2 &= \mathbf{E} \|\hat{v}_{k+1} - \nabla f(x_{k+1}) + \nabla f(x_{k+1}) - v_{k+1}\|^2 \\
&= \mathbf{E} \|\hat{v}_{k+1} - \nabla f(x_{k+1})\|^2 + \mathbf{E} \|v_{k+1} - \nabla f(x_{k+1})\|^2.
\end{aligned} \tag{32}$$

The second equality holds because the mini-batches for calculating  $\hat{v}_{k+1}$  and  $v_{k+1}$  are independent and  $\mathbf{E} \hat{v}_{k+1} = \nabla f(x_{k+1})$ . Combining Lemma 6 and Lemma 7, we obtain (31).  $\square$

**Lemma 9.** *Define*

$$\text{Prog}(x_{k+1}) \triangleq -\min_y \{2L\|y - x_{k+1}\|^2 + \langle v_{k+1}, y - x_{k+1} \rangle + h(y) - h(x_{k+1})\}, \tag{33}$$

then from the update rule of  $y$ , we obtain

$$\mathbf{E} [P(x_{k+1}) - P(y_{k+1})] \geq \mathbf{E} [\text{Prog}(x_{k+1}) - \frac{1}{6L} \|\nabla f(x_{k+1}) - v_{k+1}\|^2]. \tag{34}$$

*Proof Sketch.* (34) follows from the proof of Lemma 3.3 in [1] with different coefficients.  $\square$

**Lemma 10.** *If  $h(x)$  is  $\sigma$ -strongly convex, then for any  $u \in \mathbb{R}^d$ , we have (Lemma 3.5 in [1])*

$$\alpha \langle \hat{v}_{k+1}, z_{k+1} - u \rangle + \alpha h(z_{k+1}) - \alpha h(u) \leq -\frac{1}{2} \|z_k - z_{k+1}\|^2 + \frac{1}{2} \|z_k - u\|^2 - \frac{1 + \alpha\sigma}{2} \|z_{k+1} - u\|^2. \tag{35}$$

**Lemma 11.** *Let  $\tau_2 = \frac{5}{3}\zeta + \frac{1}{2B}$ ,  $\zeta = \frac{d\lambda^2}{4(2^{b-1}-1)^2} + d_\lambda(1-\lambda)^2 + \frac{1}{NB}$ ,  $\alpha = \frac{1}{6\tau_1 L}$ . Suppose with proper choice of parameters  $B, b, \lambda$ , we have  $\tau_2 \leq \frac{1}{2}$ , then*

$$\begin{aligned}
&\mathbf{E} \left[ \alpha \langle \nabla f(x_{k+1}), z_k - u \rangle - \alpha h(u) \right] \\
&\leq \mathbf{E} \left[ \frac{\alpha}{\tau_1} [P(x_{k+1}) - P(y_{k+1}) + \tau_2 P(\tilde{x}^s) - \tau_2 f(x_{k+1}) - \tau_2 \langle \nabla f(x_{k+1}), \tilde{x}^s - x_{k+1} \rangle] \right. \\
&\quad \left. + \frac{\alpha}{\tau_1} (1 - \tau_1 - \tau_2) h(y_k) - \frac{\alpha}{\tau_1} h(x_{k+1}) + \frac{1}{2} \|z_k - u\|^2 - \frac{1 + \alpha\sigma}{2} \|z_{k+1} - u\|^2 \right].
\end{aligned} \tag{36}$$

*Proof.*

$$\begin{aligned}
& \mathbf{E} \left[ \alpha \langle \hat{v}_{k+1}, z_k - u \rangle + \alpha h(z_{k+1}) - \alpha h(u) \right] \\
&= \mathbf{E} \left[ \alpha \langle v_{k+1}, z_k - z_{k+1} \rangle + \alpha \langle \hat{v}_{k+1} - v_{k+1}, z_k - z_{k+1} \rangle + \alpha \langle \hat{v}_{k+1}, z_{k+1} - u \rangle + \alpha h(z_{k+1}) - \alpha h(u) \right] \\
&\leq \mathbf{E} \left[ \alpha \langle v_{k+1}, z_k - z_{k+1} \rangle + \frac{\alpha}{\tau_1} \frac{1}{4L} \|\hat{v}_{k+1} - v_{k+1}\|^2 + \frac{1}{6} \|z_k - z_{k+1}\|^2 + \alpha \langle \hat{v}_{k+1}, z_{k+1} - u \rangle + \alpha h(z_{k+1}) - \alpha h(u) \right] \\
&\leq \mathbf{E} \left[ \alpha \langle v_{k+1}, z_k - z_{k+1} \rangle + \frac{\alpha}{\tau_1} \frac{1}{4L} \|\hat{v}_{k+1} - v_{k+1}\|^2 - \frac{1}{3} \|z_k - z_{k+1}\|^2 + \frac{1}{2} \|z_k - u\|^2 - \frac{1 + \alpha\sigma}{2} \|z_{k+1} - u\|^2 \right] \\
&\leq \mathbf{E} \left[ \alpha \langle v_{k+1}, z_k - z_{k+1} \rangle + \frac{\alpha}{\tau_1} \left( \zeta + \frac{1}{2B} \right) \mathbf{E} \left[ f(\tilde{x}^s) - f(x_{k+1}) - \langle \nabla f(x_{k+1}), \tilde{x}^s - x_{k+1} \rangle \right] - \frac{1}{3} \|z_k - z_{k+1}\|^2 \right. \\
&\quad \left. + \frac{1}{2} \|z_k - u\|^2 - \frac{1 + \alpha\sigma}{2} \|z_{k+1} - u\|^2 \right], \tag{37}
\end{aligned}$$

where the first inequality uses Young's inequality and  $\alpha = \frac{1}{6\tau_1 L}$ , the last two inequalities follow from Lemma 10 and Lemma 8 respectively. Define  $v \triangleq \tau_1 z_{k+1} + \tau_2 \tilde{x}^s + (1 - \tau_1 - \tau_2)y_k$ , therefore  $x_{k+1} - v = \tau_1(z_k - z_{k+1})$ , then we obtain

$$\begin{aligned}
& \mathbf{E} \left[ \alpha \langle v_{k+1}, z_k - z_{k+1} \rangle - \frac{1}{3} \|z_k - z_{k+1}\|^2 \right] \\
&= \mathbf{E} \left[ \frac{\alpha}{\tau_1} \langle v_{k+1}, x_{k+1} - v \rangle - \frac{1}{3\tau_1^2} \|x_{k+1} - v\|^2 \right] \\
&= \mathbf{E} \left[ \frac{\alpha}{\tau_1} \left( \langle v_{k+1}, x_{k+1} - v \rangle - \frac{1}{3\alpha\tau_1} \|x_{k+1} - v\|^2 - h(v) + h(x_{k+1}) \right) + \frac{\alpha}{\tau_1} \left( h(v) - h(x_{k+1}) \right) \right] \\
&= \mathbf{E} \left[ \frac{\alpha}{\tau_1} \left( \langle v_{k+1}, x_{k+1} - v \rangle - 2L \|x_{k+1} - v\|^2 - h(v) + h(x_{k+1}) \right) + \frac{\alpha}{\tau_1} \left( h(v) - h(x_{k+1}) \right) \right] \\
&\leq \mathbf{E} \left[ \frac{\alpha}{\tau_1} \left( P(x_{k+1}) - P(y_{k+1}) + \frac{1}{6L} \|v_{k+1} - \nabla f(x_{k+1})\|^2 \right) + \frac{\alpha}{\tau_1} \left( h(v) - h(x_{k+1}) \right) \right] \\
&\leq \frac{\alpha}{\tau_1} \mathbf{E} \left[ P(x_{k+1}) - P(y_{k+1}) \right] + \frac{\alpha}{\tau_1} \frac{2}{3} \zeta \mathbf{E} \left[ f(\tilde{x}^s) - f(x_{k+1}) - \langle \nabla f(x_{k+1}), \tilde{x}^s - x_{k+1} \rangle \right] + \frac{\alpha}{\tau_1} \mathbf{E} \left[ h(v) - h(x_{k+1}) \right], \tag{38}
\end{aligned}$$

where the third equality uses  $\alpha = \frac{1}{6\tau_1 L}$ , the first inequality follows from Lemma 9 and the last inequality adopts Lemma 7. Substituting (38) into (37) we get

$$\begin{aligned}
& \mathbf{E} \left[ \alpha \langle \hat{v}_{k+1}, z_k - u \rangle + \alpha h(z_{k+1}) - \alpha h(u) \right] \\
&\leq \mathbf{E} \left[ \frac{\alpha}{\tau_1} \left[ P(x_{k+1}) - P(y_{k+1}) \right] + \frac{\alpha}{\tau_1} \tau_2 \left[ f(\tilde{x}^s) - f(x_{k+1}) - \langle \nabla f(x_{k+1}), \tilde{x}^s - x_{k+1} \rangle \right] \right] \\
&\quad + \frac{1}{2} \|z_k - u\|^2 - \frac{1 + \alpha\sigma}{2} \|z_{k+1} - u\|^2 + \frac{\alpha}{\tau_1} \left[ \tau_1 h(z_{k+1}) + \tau_2 h(\tilde{x}^s) + (1 - \tau_1 - \tau_2) h(y_k) - h(x_{k+1}) \right]. \tag{39}
\end{aligned}$$

Because  $\hat{v}_{k+1}$  is unbiased, we get (36) after rearranging terms.  $\square$

**Proof of Theorem 3.** Starting from Lemma 11, following the proof of ([1], Lemma 3.7, Theorem 3.1), we get

$$\begin{aligned}
& \mathbf{E} \left[ \frac{\tau_1 + \tau_2 - (1 - \frac{1}{\theta})}{\tau_1} \theta \tilde{D}^{s+1} \cdot \sum_{t=0}^{m-1} \theta^t \right] \\
&\leq \mathbf{E} \left[ \frac{1 - \tau_1 - \tau_2}{\tau_1} (D_{sm} - \theta^m D_{(s+1)m}) + \frac{\tau_2}{\tau_1} \tilde{D}^s \sum_{t=0}^{m-1} \theta^t + \frac{1}{2\alpha} \|z_{sm} - x^*\|^2 - \frac{\theta^m}{2\alpha} \|z_{(s+1)m} - x^*\|^2 \right], \tag{40}
\end{aligned}$$

where  $\theta = (1 + \alpha\sigma)$ ,  $D_k \triangleq P(y_k) - P(x^*)$ ,  $\tilde{D}^s \triangleq P(\tilde{x}^s) - P(x^*)$ .

If  $\frac{m\sigma}{L} \leq \frac{3}{2}$ , then  $\sqrt{\frac{m\sigma}{6L}} \leq \frac{1}{2}$ . Choosing  $\alpha = \frac{1}{\sqrt{6m\sigma L}}$ , then  $\tau_1 = \frac{1}{6\alpha L} = m\sigma\alpha = \sqrt{\frac{m\sigma}{6L}} \leq \frac{1}{2}$  and  $\alpha\sigma \leq \frac{1}{2m}$ .

It can be verified that the above parameter settings guarantee **Case 1.** in ([1], Theorem 1), therefore, with the same arguments we arrive at

$$\mathbf{E}[P(\tilde{x}^S) - P(x^*)] \leq O((1 + \alpha\sigma)^{-Sm})[P(x_0) - P(x^*)]. \quad (41)$$

□

**Proof Sketch of Theorem 4.** Let  $\alpha_s = \frac{1}{6L\tau_{1,s}}$ ,  $\tau_{1,s} = \frac{2}{s+4}$  and  $\tau_2$  unchanged. It can be verified that Lemma 11 also holds in the current parameter setting (with  $\sigma = 0$ ), then plug Lemma 11 into the proof of Theorem 4.1 in [1], we get

$$\mathbf{E}[P(\tilde{x}^S) - P(x^*)] \leq O\left(\frac{1}{mS^2}\right)[m(P(x_0) - P(x^*)) + L\|x_0 - x^*\|^2]. \quad (42)$$

□

## References

- [1] Z. Allen-Zhu. Katyusha: The first direct acceleration of stochastic gradient methods. In *STOC*, pages 1200–1205, 2017.
- [2] S. J. Reddi, S. Sra, B. Póczos, and A. Smola. Fast stochastic methods for nonsmooth nonconvex optimization. In *Advances in Neural Information Processing Systems*, 2016.
